# Supplementary material for: TOP2B Is Required to Maintain the Adrenergic Neural Phenotype and for ATRA-Induced Differentiation of SH-SY5Y Neuroblastoma Cells
Source: PubMed Central journal article supplement (PMC9463316; doi:10.1007/s12035-022-02949-6), 2022-07-13
Supplement: 12035_2022_2949_MOESM2_ESM.pdf [file 12035_2022_2949_MOESM2_ESM.pdf]

## Supplementary material

Article title: TOP2B is required to maintain the adrenergic neural phenotype and for ATRA-induced differentiation of SH-SY5Y neuroblastoma cells.

**Journal name:** Molecular Neurobiology

### Authors name and affiliations:

Mushtaq M. Khazeem<sup>1</sup>, John W. Casement<sup>2</sup>, George Schlossmacher<sup>1</sup>, Niall S. Kenneth<sup>1,3</sup>, Niida K. Sumbung<sup>1</sup>, Janice Yuen Tung Chan<sup>1</sup>, Jade F. McGow<sup>1</sup>, Ian G. Cowell<sup>1\*</sup>, and Caroline A. Austin<sup>1\*</sup>

#### \*Corresponding authors

Prof. Caroline A. Austin

[caroline.austin@ncl.ac.uk](mailto:caroline.austin@ncl.ac.uk). ORCID <https://orcid.org/0000-0002-1921-5947>

Dr Ian G. Cowell

[ian.cowell@ncl.ac.uk](mailto:ian.cowell@ncl.ac.uk). ORCID <https://orcid.org/0000-0002-8606-0447>

#### Other authors

MMK: <https://orcid.org/0000-0003-2948-8225>

NSK: <https://orcid.org/0000-0001-8528-1021>

GS: <https://orcid.org/0000-0001-7713-5729>

NZS

JYTC: <https://orcid.org/0000-0001-9203-2699>

JM

#### Addresses:

1. Biosciences Institute, The Faculty of Medical Sciences, Newcastle University, Newcastle upon Tyne NE2 4HH, UK
2. Bioinformatics Support Unit, The Faculty of Medical Sciences, Newcastle University, Newcastle upon Tyne NE2 4HH, UK
3. Current address: National Center of Hematology, Mustansiriyah University, Baghdad, Iraq.
4. Current address: Institute of Systems, Molecular and Integrative Biology, University of Liverpool, Liverpool L69 7ZB, UK.

## Supplemental Figures, Tables and Legends

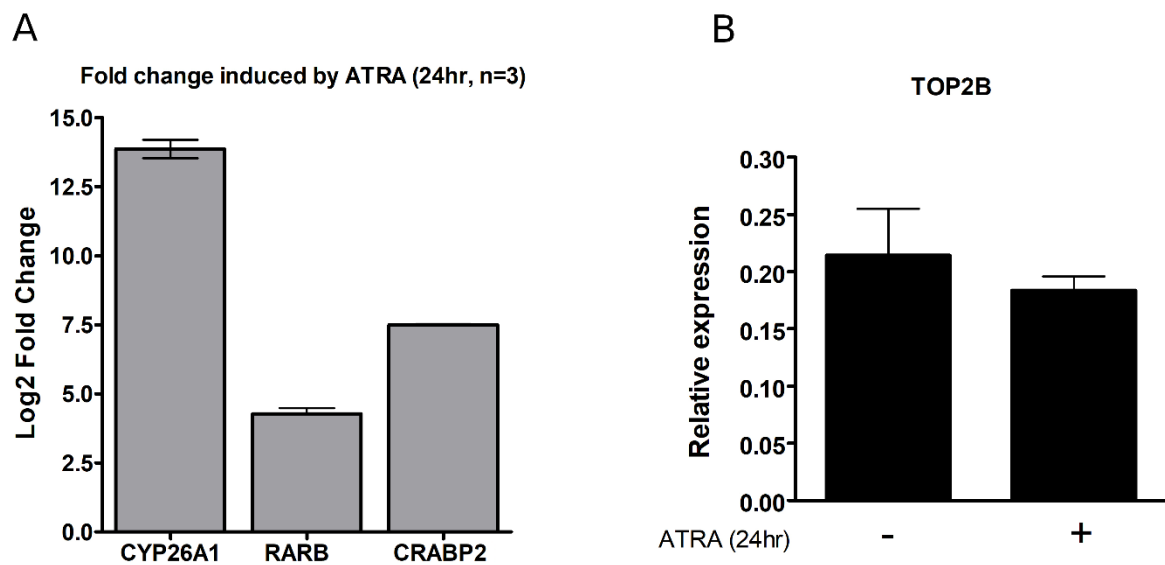

**Figure S1. SH-SY5Y respond to ATRA.** Cells were treated with 1 $\mu$ M ATRA or solvent control for 24 hours before collecting cells for RT-PCR analysis. **(A)** Induction of *CYP26A1*, *RARB* and *CRABP2* expression. **(B)** TOP2B expression is not affected by ATRA treatment. Data are expressed as expression relative to that of PP1A, were obtained from three biological replicates and are shown as mean values  $\pm$  SEM.

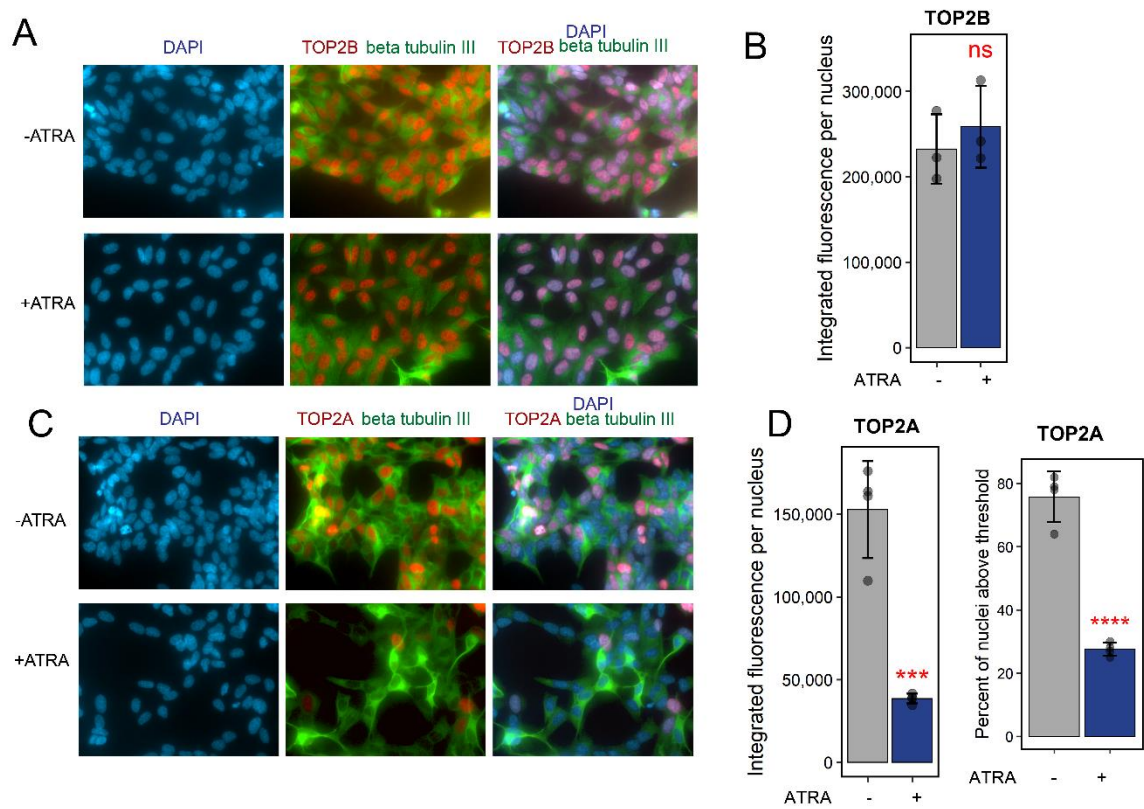

**Figure S2. Expression of TOP2B and TOP2A in SH-SY5Y cells before and after ATRA-induced differentiation.** Cells were cultured for 5 days in the presence of 1 $\mu$ M ATRA or solvent control. **(A)** Immunofluorescence analysis (40X objective) was carried out of using anti-beta-tubulin III (cytoplasmic neuronal marker, green, 2G10) and anti-TOP2B (red, 4555, top). **(B)** Relative TOP2B expression using quantitative immunofluorescence with anti-TOP2B-MAB6346. Data are expressed as the mean of the median fluorescence per nucleus values obtained for three replicates. **(C)** TOP2A immunofluorescence images as for (A) but employing anti-TOP2A 4566. **(D)** Quantitation of TOP2A expression. Left relative expression per cell (as in (B)); right, percentage of cells that strongly expressed TOP2A before and after ATRA treatment. The threshold for “strong expression” was taken as the mean of the lower quartile value for control (no ATRA) cell replicas. Statistical analysis was performed by t-test (\*\*\*) =  $P < 0.001$ , \*\*\*\* =  $P < 0.0001$ ).

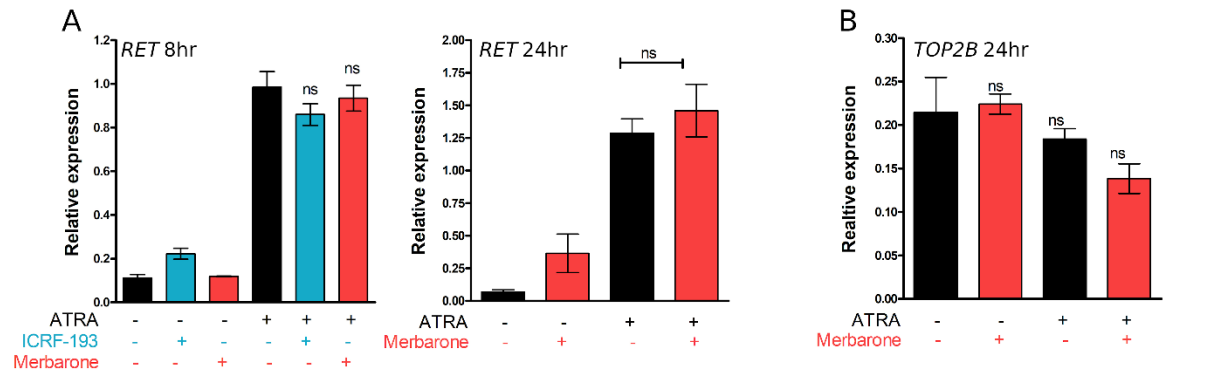

**Figure S3. TOP2 catalytic inhibitors do not significantly affect ATRA-induced expression of *RET*, nor the expression of *TOP2B*.** Relative expression for **(A)** *RET* and **(B)** *TOP2B*. See legend to Fig. 1 for details

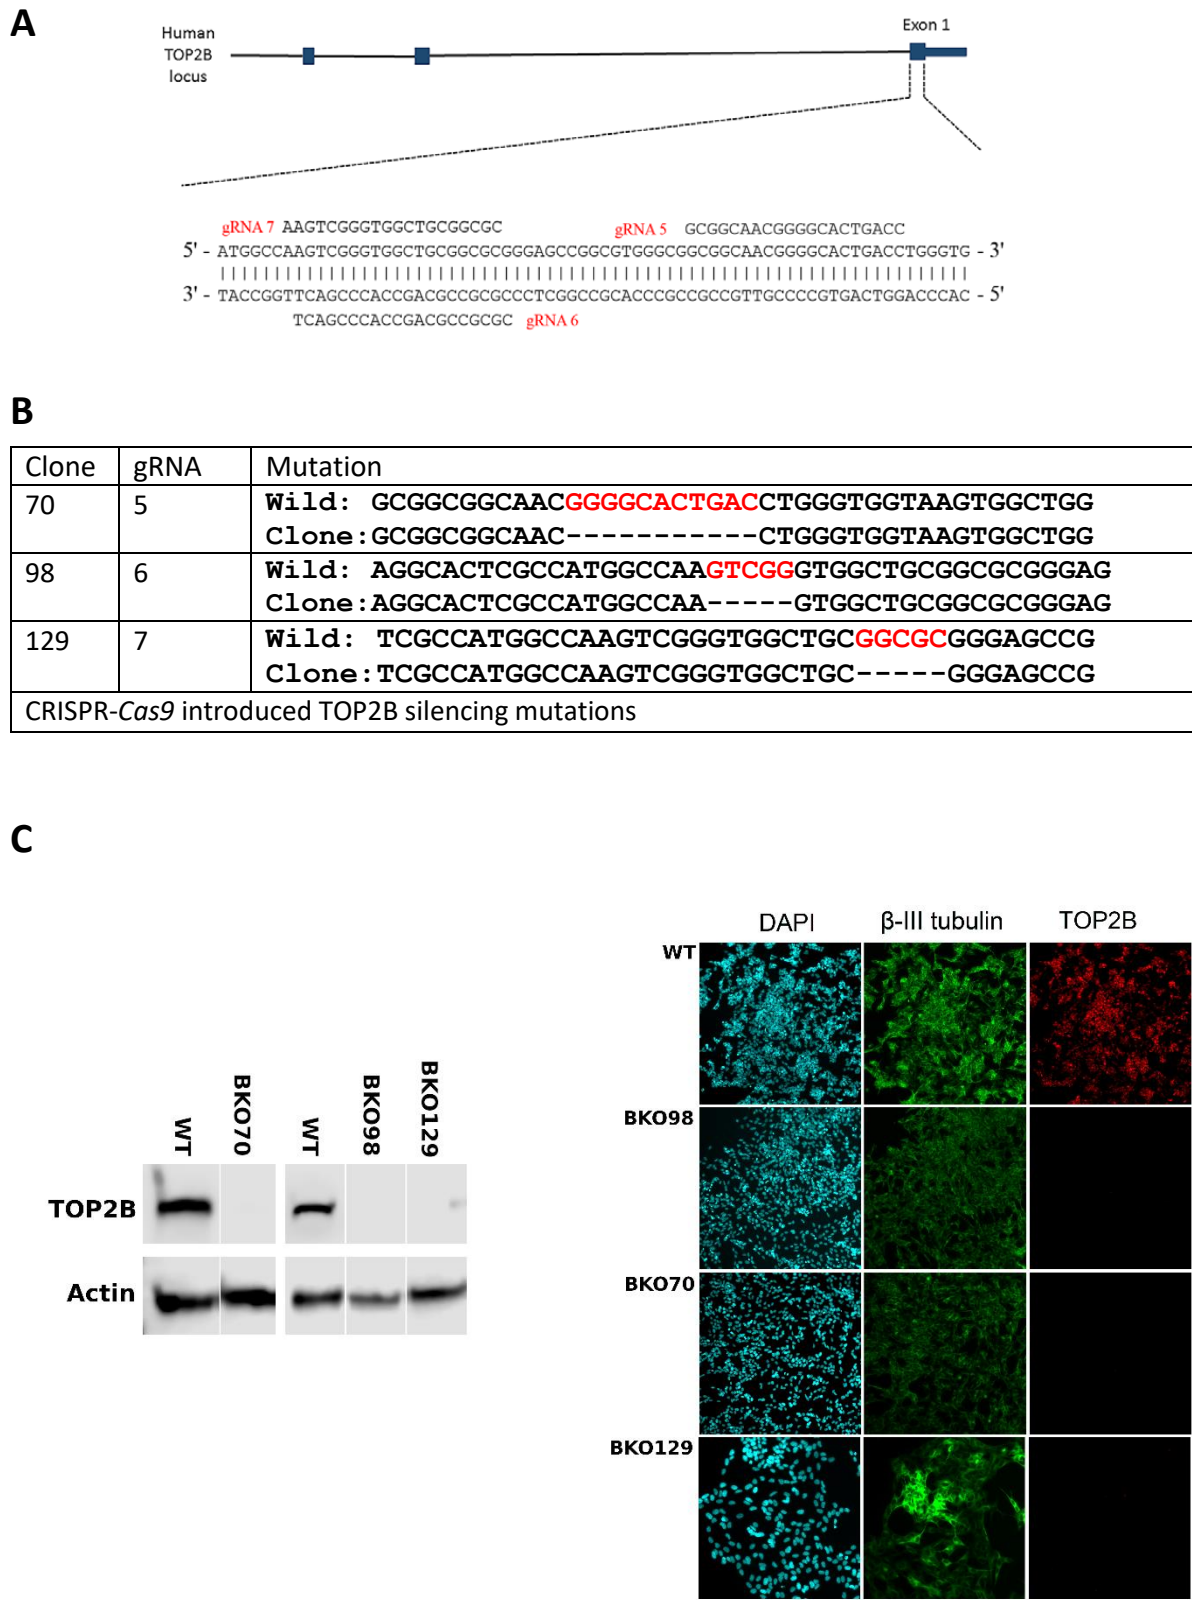

**Figure S4. TOP2B CRISPR-Cas9 guide RNAs and verification of TOP2B null SH-SY5Y clones. (A)** position of guide RNAs within TOP2B exon 1. **(B)** DNA sequencing results verifying homozygous frame shift mutations in TOP2B<sup>-/-</sup> clones BKO70, BKO98 and BKO129. **(C)** Western blot and immunofluorescence verification of TOP2B null phenotype.

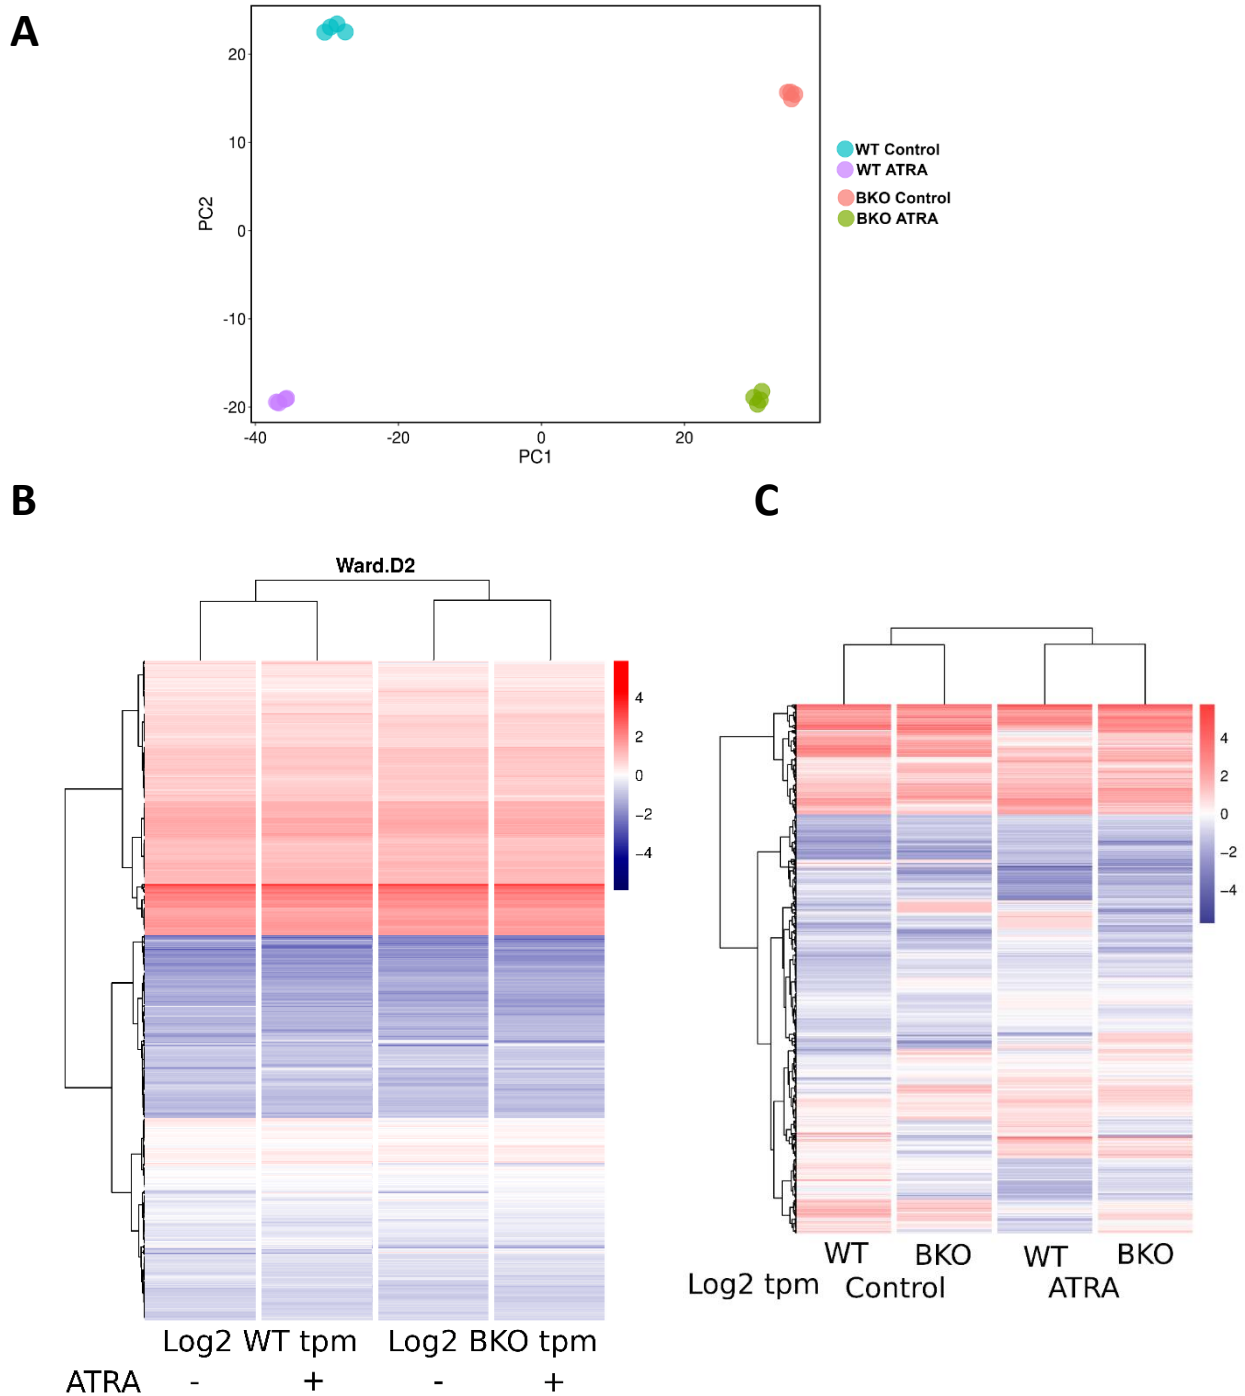

**Figure S5. RNA-seq data characteristics.** (A) PCA plot from DESeq2 illustrating tight clustering of the four RNA biological replica samples. ATRA treatment was for 10 $\mu$ M ATRA in ethanol for 24hr, control cells were treated with an equivalent volume of ethanol. (B) Heatmap comparing relative expression levels (tpm values from four replicates) from each of the four conditions for genes. (C) Heatmap as for (B) but including only genes whose expression changes in WT cells upon ATRA treatment with a Log2FC > 2 or < -2.

WT versus BKO (No ATRA) BP terms from up down regulated genes

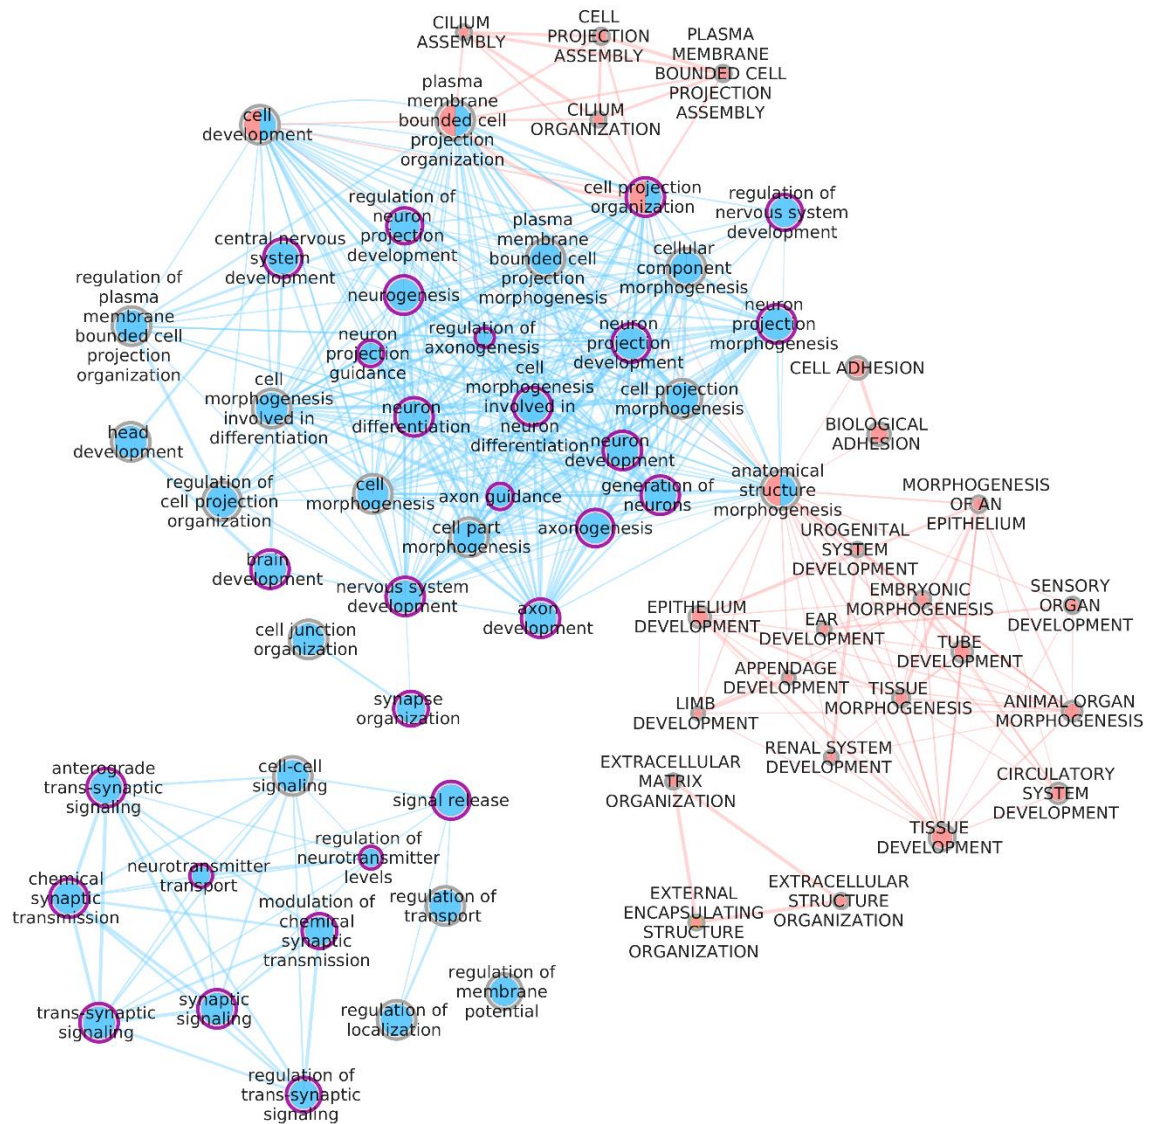

**Figure S6. Functional interaction network of GO:Biological Process terms associated with genes up- (red) or down- (blue) regulated >1.5 X in TOP2B null (BKO98) versus WT SH-SY5Y cells. Terms related primarily with neuronal development or function are circled in purple.**



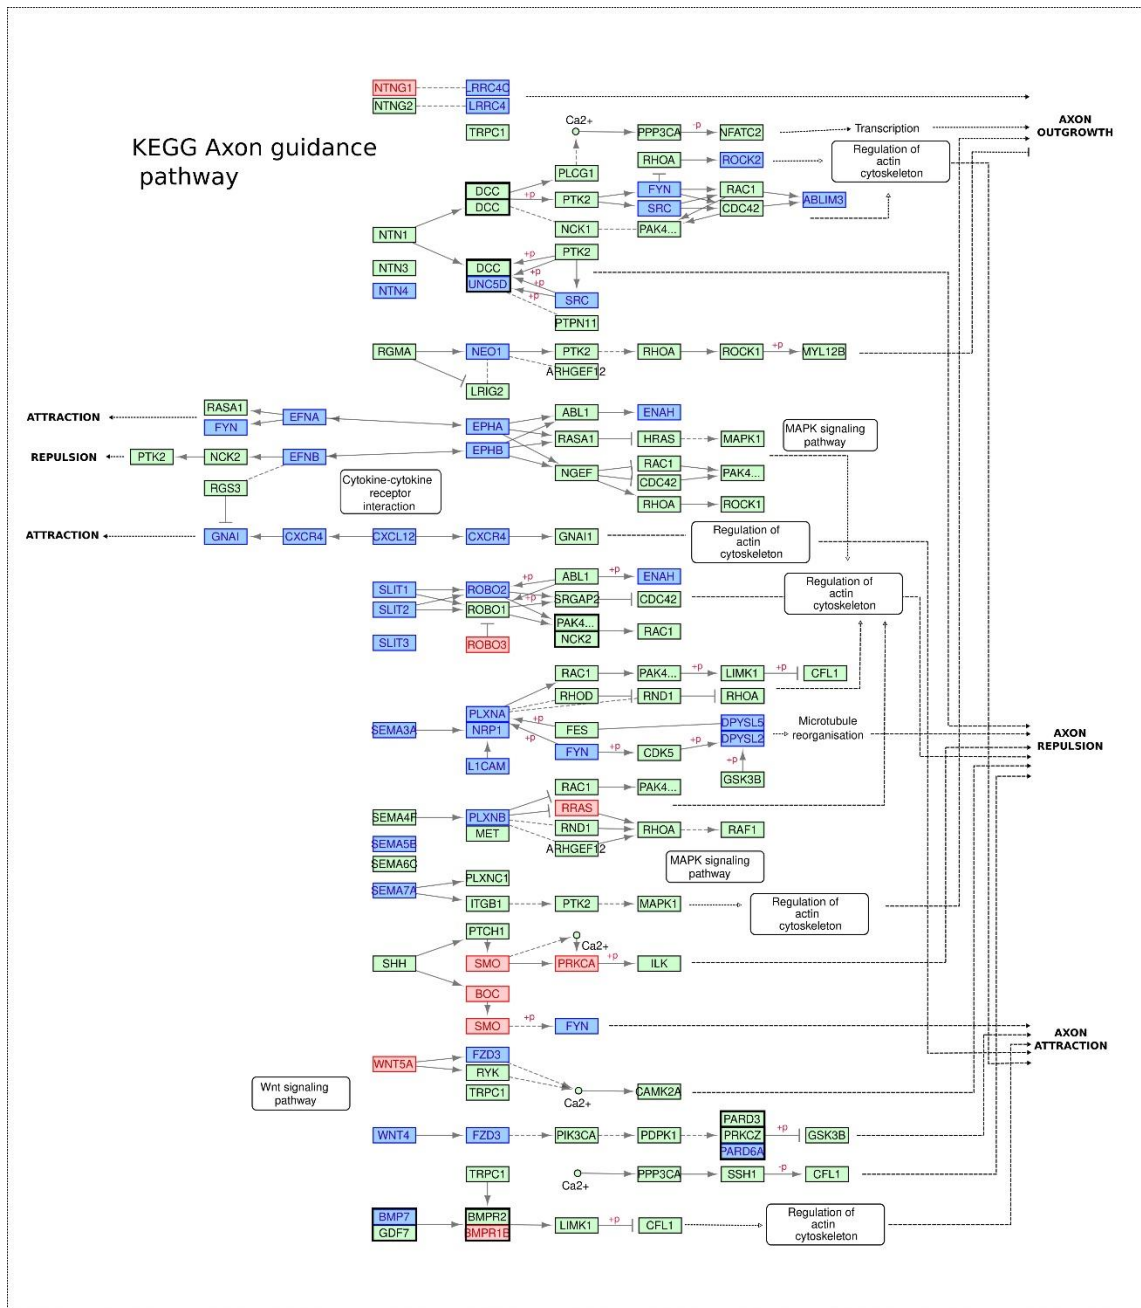

**Figure S7. KEGG axon guidance pathway.** Genes down regulated in TOP2B null SH-SY5Y cells are highlighted in blue, and those upregulated are highlighted in red.



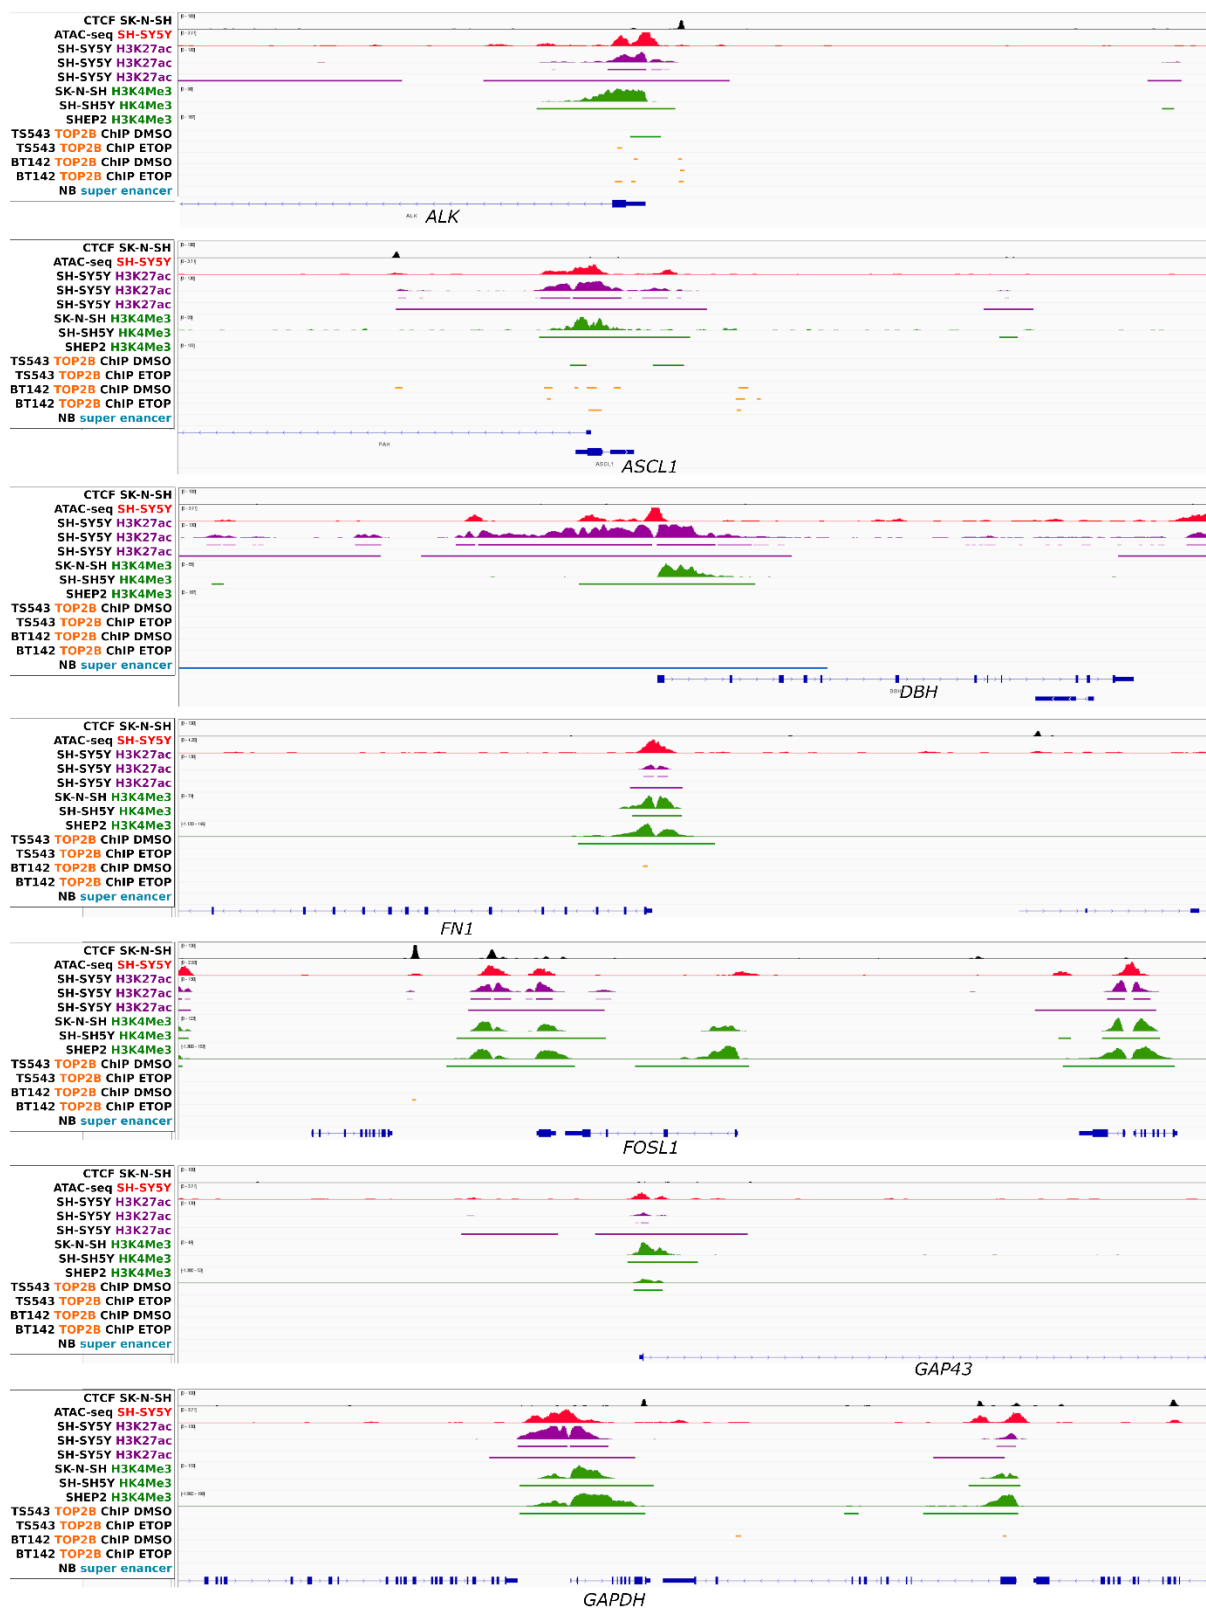

Fig. S8 continued on next page

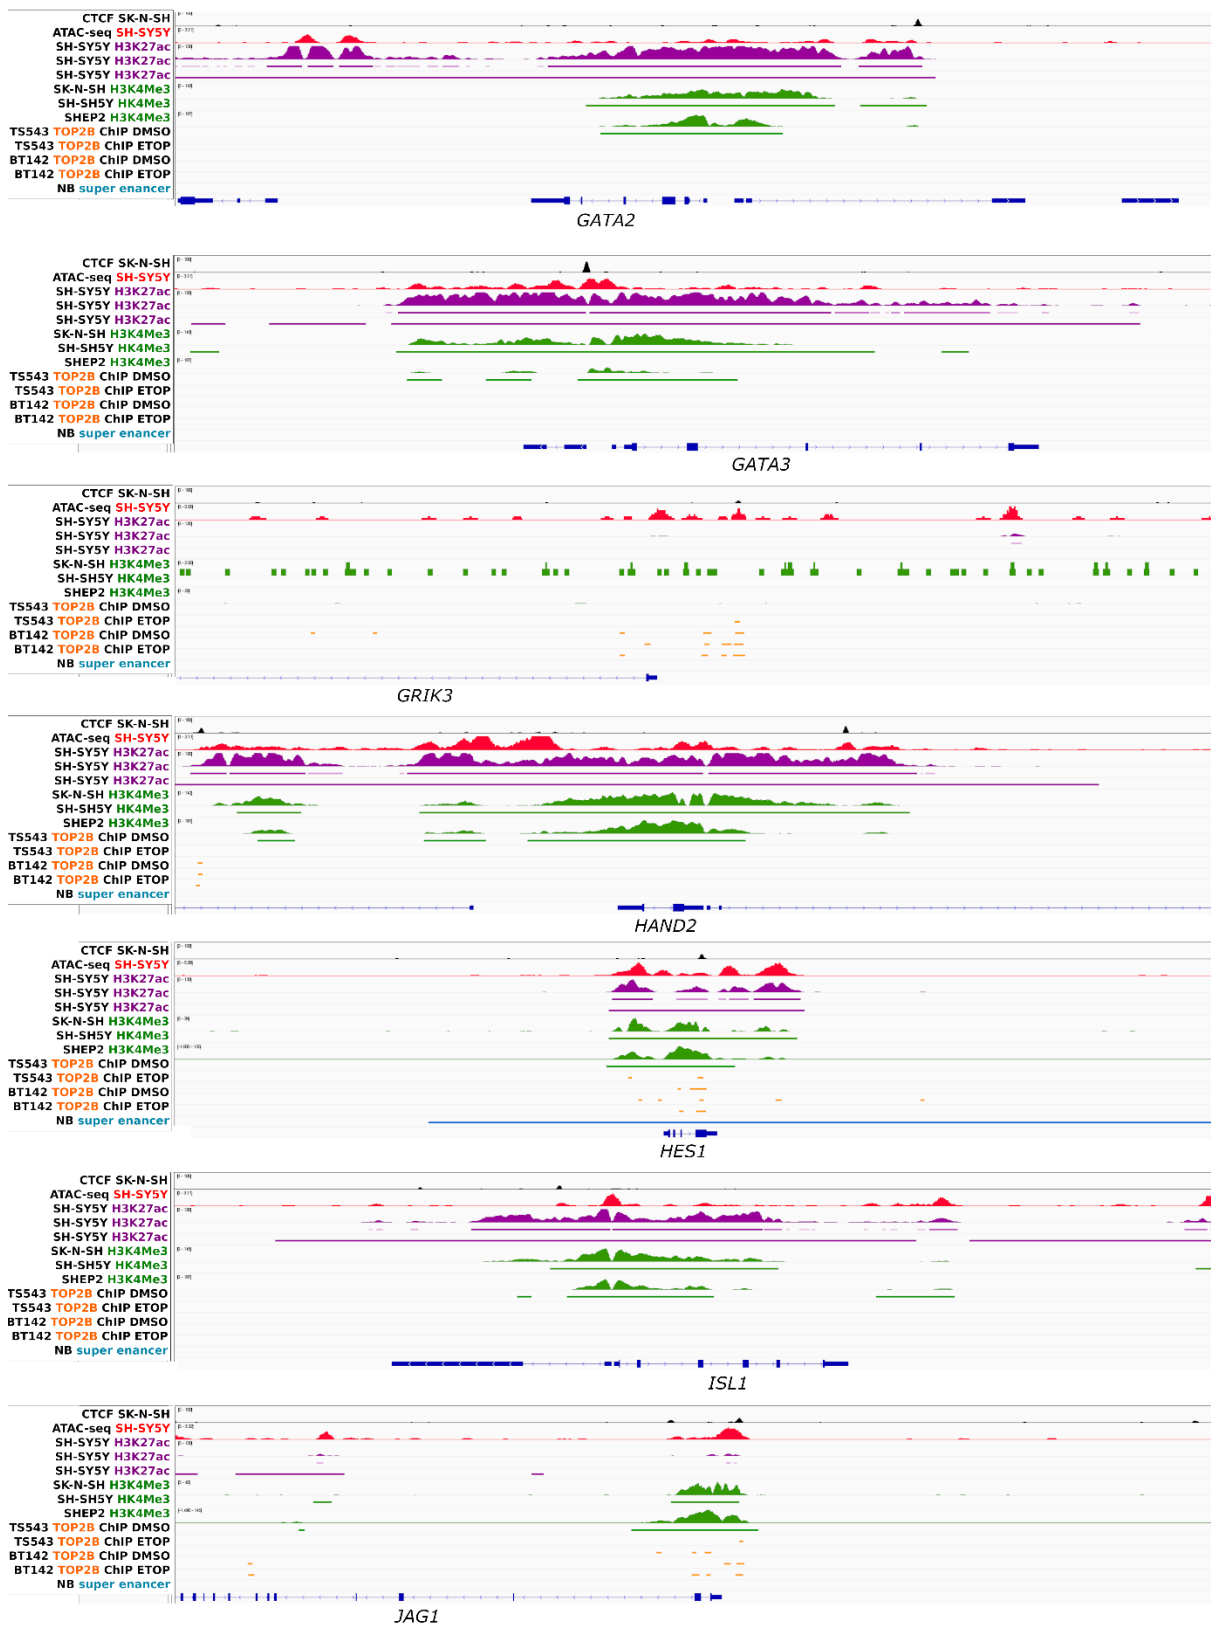

Fig. S8 continued on next page

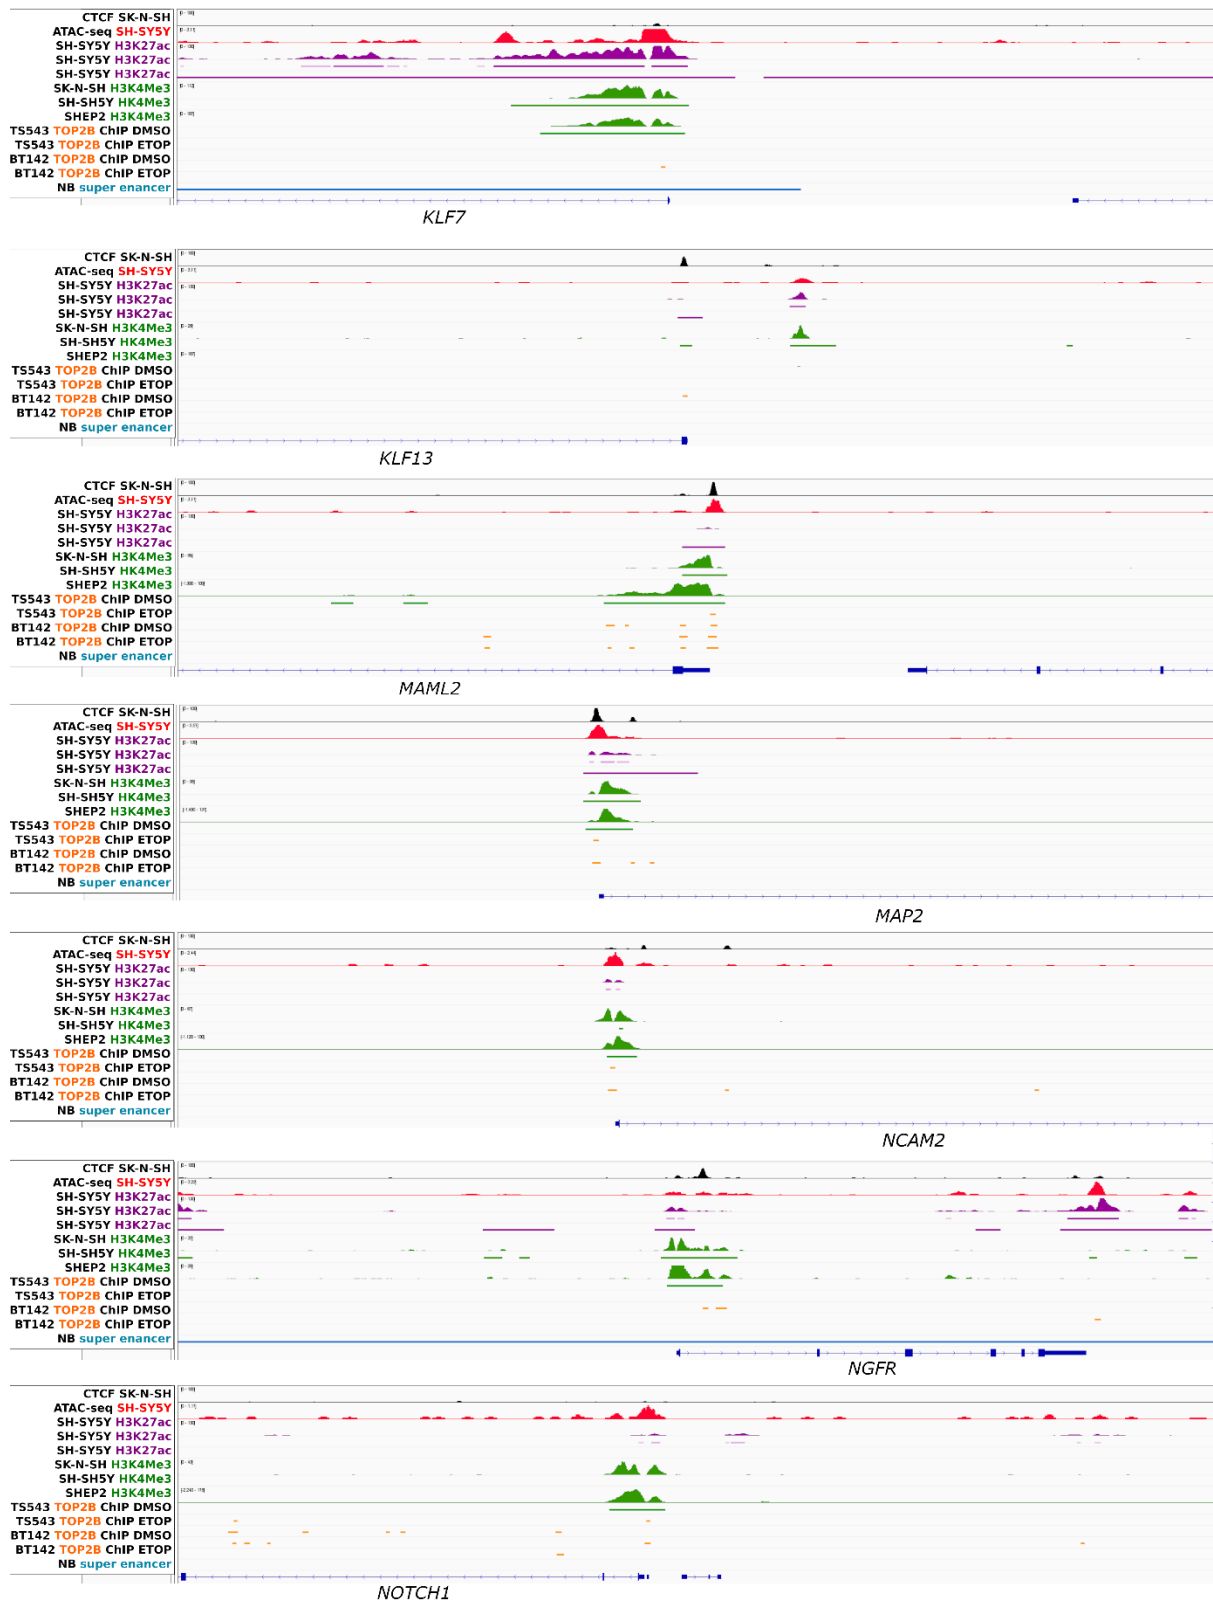

Fig. S8 continued on next page

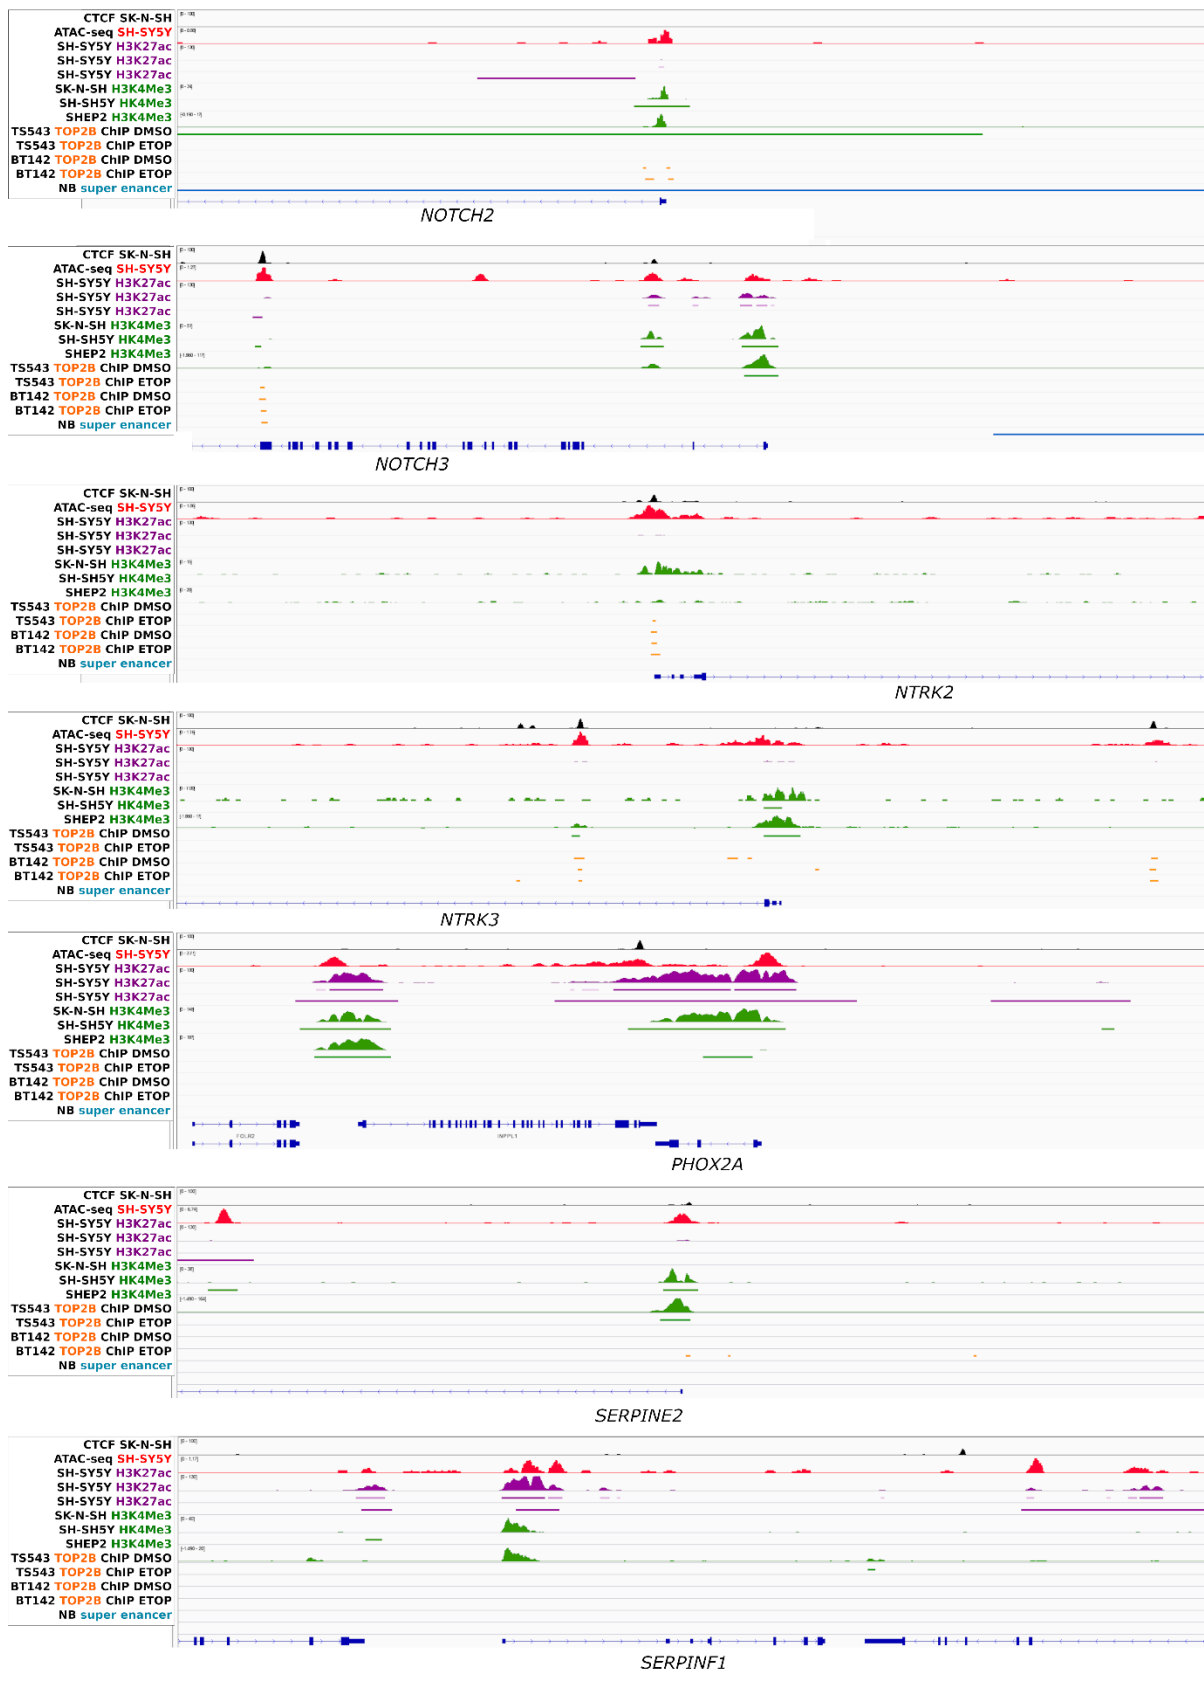

Fig. S8 continued on next page

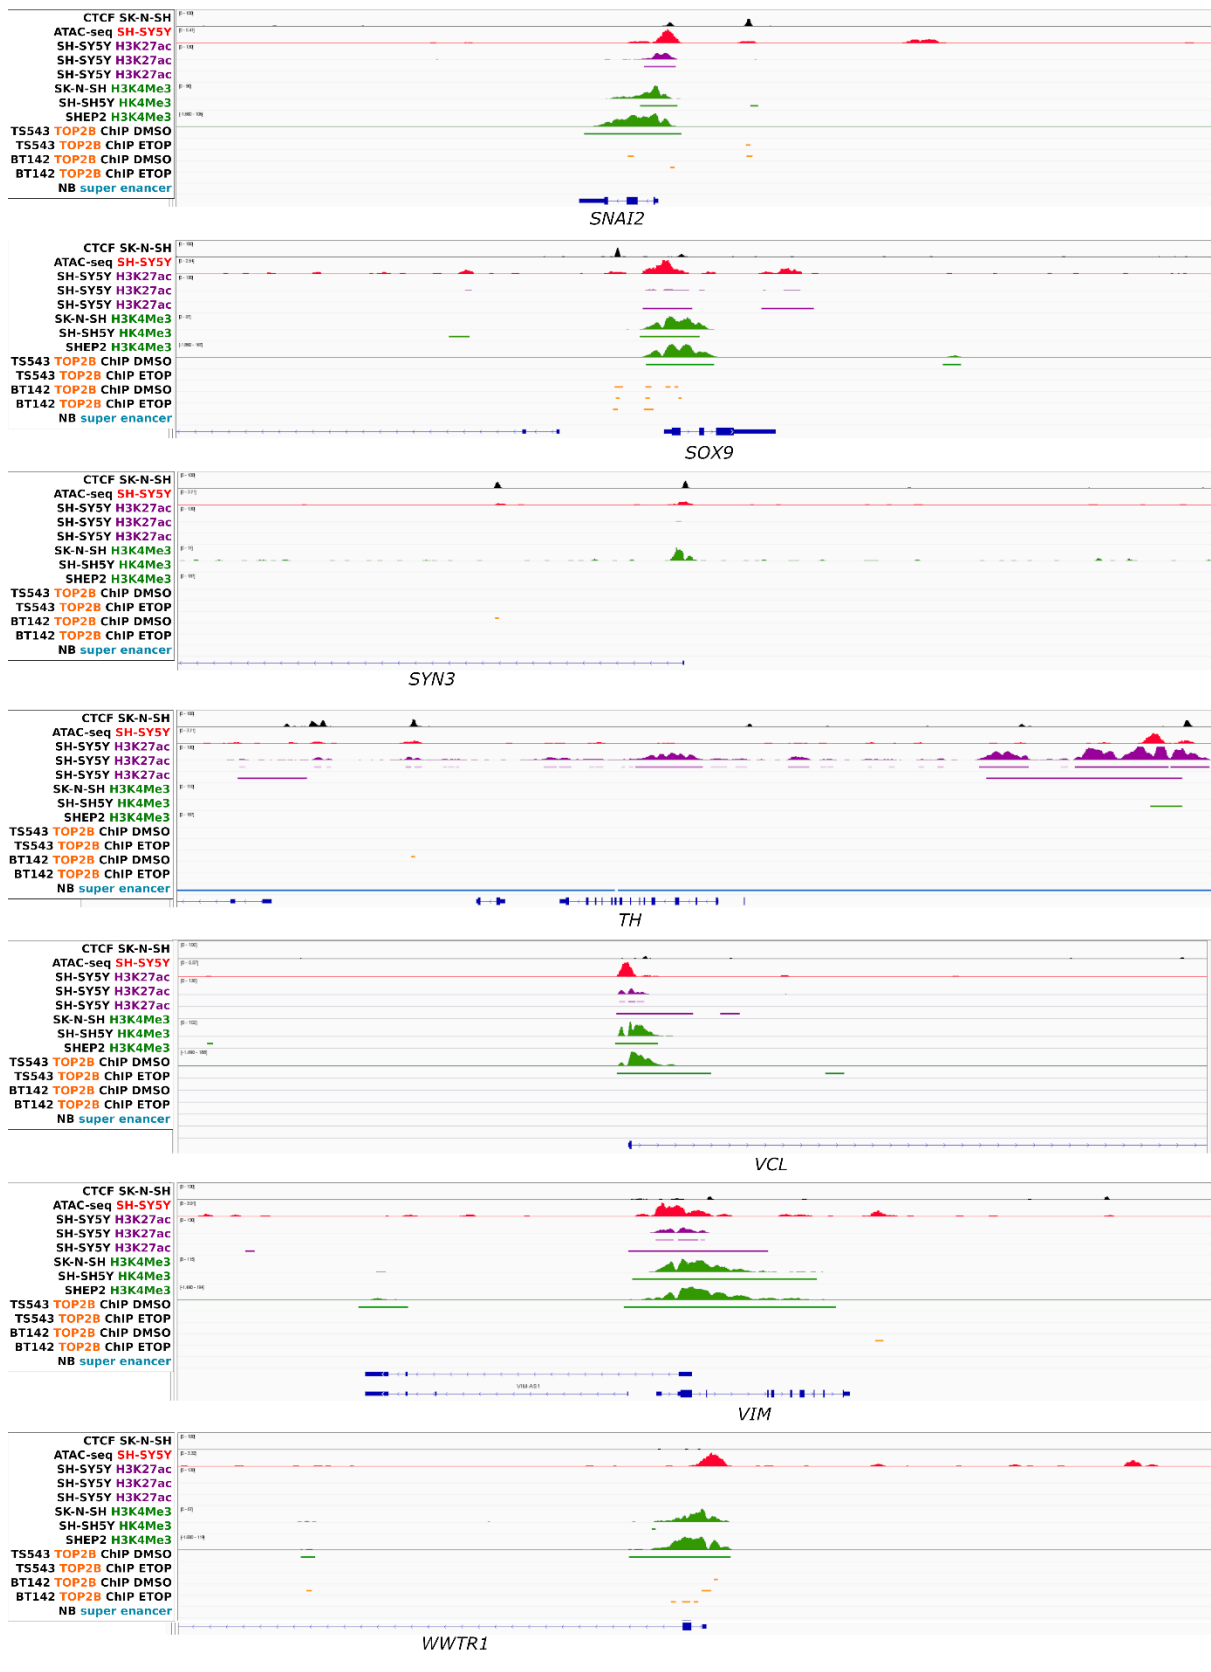

Fig. S8 legend on next page





WT versus BKO BPs from ATRA downregulated genes

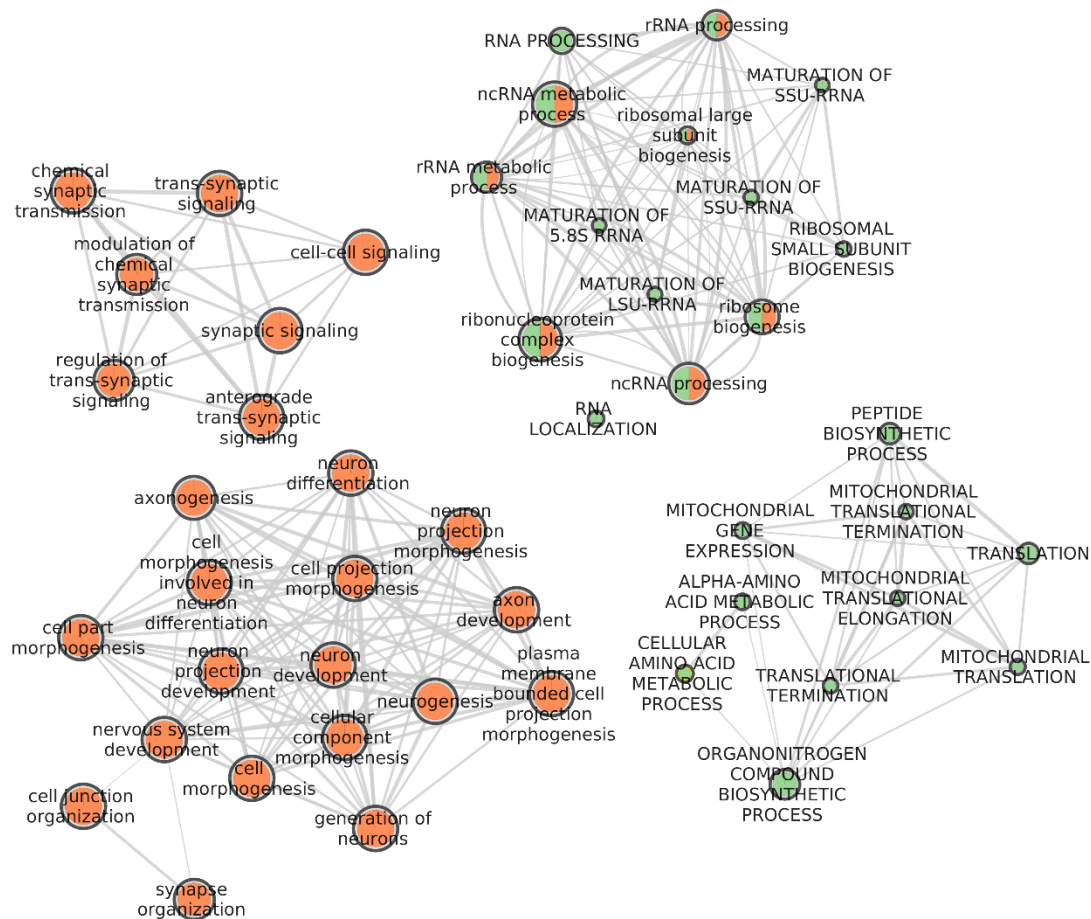

**Figure S10. Functional interaction network of GO:Biological Process terms associated with genes down-regulated >1.5 X by ATRA treatment (24hr) contrasting differences between in WT (green) and BKO98 cells (Orange).**

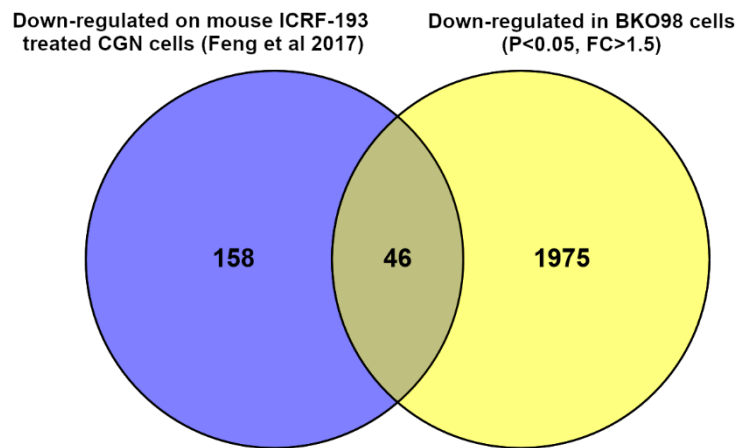

**Fig. S11** Overlap between protein coding genes downregulated in TOP2B null BKO98 cells (compared to WT SH-SY5Y cells) and corresponding genes downregulated in ICRF-193 treated mouse CGN cells.

**Table S1. Gene symbols and corresponding gene/protein names and relevant details of genes mentioned in the text.**

| <b>WT SH-SY5Y versus BKO98 (WT_C V BKO_C)</b> |                                                               |                                                                                                                                                                                                                                                                                                          |
|-----------------------------------------------|---------------------------------------------------------------|----------------------------------------------------------------------------------------------------------------------------------------------------------------------------------------------------------------------------------------------------------------------------------------------------------|
| <b>Gene Symbol</b>                            | <b>Gene / protein names</b>                                   | <b>Comments</b>                                                                                                                                                                                                                                                                                          |
| <i>ALK</i>                                    | ALK Receptor Tyrosine Kinase, Anaplastic Lymphoma Kinase      | Gain of function mutations associated with neuroblastoma                                                                                                                                                                                                                                                 |
| <i>GABRB3</i>                                 | Gamma-Aminobutyric Acid Type A Receptor Subunit Beta3         | Component of the multi-subunit receptor for the inhibitory neurotransmitter GABA                                                                                                                                                                                                                         |
| <i>GAP43</i>                                  | Growth Associated Protein 43, Axonal Membrane Protein GAP-43  | Expressed at high levels in neuronal growth cones during development and axonal regeneration.                                                                                                                                                                                                            |
| <i>GRIK3</i>                                  | Glutamate Receptor Ionotropic, Kainate 3                      | Associated with schizophrenia, glutamate receptors are the major excitatory neurotransmitter receptors in the brain                                                                                                                                                                                      |
| <i>KCNQ3</i>                                  | Potassium Voltage-Gated Channel Subfamily Q Member 3          | Functions associated with neuronal excitability                                                                                                                                                                                                                                                          |
| <i>KCNT1</i>                                  | Potassium Sodium-Activated Channel Subfamily T Member 1       |                                                                                                                                                                                                                                                                                                          |
| <i>LRRTM2</i>                                 | Leucine Rich Repeat Transmembrane Neuronal 2                  | involved in excitatory synapse development and maintenance                                                                                                                                                                                                                                               |
| <i>MAP2</i>                                   | Microtubule Associated Protein 2                              | Probably involved in forming and maintaining dendrites                                                                                                                                                                                                                                                   |
| <i>NGFR</i>                                   | Nerve Growth Factor Receptor, P75NTR, P75                     |                                                                                                                                                                                                                                                                                                          |
| <i>NNAT</i>                                   | Neuronatin, Peg5                                              | Possibly involved in the regulation of ion channels during brain development                                                                                                                                                                                                                             |
| <i>NOTCH2</i>                                 | Notch Receptor 2, Neurogenic Locus Notch Homolog Protein 2    |                                                                                                                                                                                                                                                                                                          |
| <i>NTRK2</i>                                  | Neurotrophic Receptor Tyrosine Kinase 2, TrkB Tyrosine Kinase | Receptor for BDNF (brain-derived neurotrophic factor neurotrophin-4). Receptor tyrosine kinase involved in development and the maturation of the central and the peripheral nervous systems. Modulates neuron survival, proliferation, migration, differentiation, and synapse formation and plasticity. |
| <i>SEZ6L</i>                                  | Seizure Related 6 Homolog Like                                | Associated with autism spectrum disorder and may contribute to specialized neuronal endoplasmic reticulum functions.                                                                                                                                                                                     |
| <i>SRRM4</i>                                  | Serine/Arginine Repetitive Matrix 4,                          | Splicing factor required for neural differentiation, stimulates alternative splicing and inclusion of neural-specific exons in mRNAs.                                                                                                                                                                    |
| <i>VIM</i>                                    | Vimentin                                                      | Class-III intermediate filament expressed in various non-epithelial cells, especially mesenchymal cells.                                                                                                                                                                                                 |

**Table 1. ctd****WT SH-SY5Y control versus WT SH-SY5Y + ATRA (WT\_C V WT\_R)**

| <b>Gene Symbol</b> | <b>Gene / protein names</b>                                    | <b>Comments</b>                                                                                                                                                                                                 |
|--------------------|----------------------------------------------------------------|-----------------------------------------------------------------------------------------------------------------------------------------------------------------------------------------------------------------|
| <i>BCL2</i>        | BCL2 Apoptosis Regulator                                       | Suppresses apoptosis in various cell systems including neural cells by controlling the mitochondrial membrane permeability.                                                                                     |
| <i>CRABP2</i>      | Cellular Retinoic Acid Binding Protein 2                       | Cytosol-to-nuclear shuttling protein facilitating RA binding to its cognate receptor complex                                                                                                                    |
| <i>CYP26A1</i>     | Cytochrome P450 Family 26 Subfamily A Member 1, P450RAI        | Monooxygenase involved in metabolism and synthesis of cholesterol, steroids and other lipids, regulates the cellular level of retinoic acid                                                                     |
| <i>CYP26B1</i>     | Cytochrome P450 Family 26 Subfamily B Member 1, P450RAI2       | see above                                                                                                                                                                                                       |
| <i>DHRS3</i>       | Dehydrogenase/Reductase 3, Retinol Dehydrogenase 17            | Catalyses the oxidation/reduction of a number of substrates, including retinoids                                                                                                                                |
| <i>HEY1</i>        | Hes Related Family BHLH Transcription Factor With YRPW Motif 1 | Transcriptional repressor, downstream effector of Notch signalling, may promote maintenance of neuronal precursor cells.                                                                                        |
| <i>HOXC4</i>       | Homeobox C4                                                    | Transcription factor with a role in morphogenesis                                                                                                                                                               |
| <i>HOXD10</i>      | Homeobox D10                                                   | Transcription factor with a role in morphogenesis                                                                                                                                                               |
| <i>HOXD8</i>       | Homeobox D8                                                    | Transcription factor with a role in morphogenesis                                                                                                                                                               |
| <i>MYC</i>         | MYC Proto-Oncogene, BHLH Transcription Factor                  | Transcription factor that plays a role in cell cycle progression, apoptosis, and cellular transformation.                                                                                                       |
| <i>PPARG</i>       | Peroxisome Proliferator Activated Receptor Gamma, NR1C3        | Forms a heterodimer with retinoid X receptor, involved in adipocyte differentiation                                                                                                                             |
| <i>RARB</i>        | Retinoic Acid Receptor Beta,                                   | Member of the thyroid-steroid hormone nuclear receptor superfamily, binds retinoic acid mediating cellular signalling in embryonic development, cell growth and differentiation.                                |
| <i>RELN</i>        | Reelin, RL                                                     | Encodes a large extracellular matrix protein involved in cell positioning and neuronal migration during brain development. Associated with schizophrenia, ASD and other neurodevelopmental conditions.          |
| <i>RET</i>         | RET Receptor Tyrosine Kinase                                   | Transmembrane receptor tyrosine kinase binding ligands including GDNF (glial cell-line derived neurotrophic factor). Facilitates development of the nervous system and of tissues derived from the neural crest |

**Table 1. ctd****Long genes**

| <b>Gene Symbol</b> | <b>Gene/protein name</b>                                                        | <b>Comments</b>                                                                                                                                                                                                 |
|--------------------|---------------------------------------------------------------------------------|-----------------------------------------------------------------------------------------------------------------------------------------------------------------------------------------------------------------|
| <i>ANK2</i>        | Ankyrin 2, brain ankyrin                                                        |                                                                                                                                                                                                                 |
| <i>CACNA1C</i>     | Calcium Voltage-Gated Channel Subunit Alpha1 C                                  |                                                                                                                                                                                                                 |
| <i>CNTN4</i>       | Contactin 4, Neural Cell Adhesion Protein BIG-2                                 | A phosphatidylethanolamine-anchored neuronal membrane protein, axonal-associated cell adhesion molecule with likely role in neuronal network formation and plasticity. Associated with autism spectrum disorder |
| <i>CNTN5</i>       | Contactin 5                                                                     | Mediate cell surface interactions during nervous system development.                                                                                                                                            |
| <i>CNTNAP2</i>     | Contactin Associated Protein 2                                                  | Member of the neurexin family of nervous system cell adhesion molecules and receptors. Associated with autistic spectrum disorder                                                                               |
| <i>DPP6</i>        | Dipeptidyl Peptidase Like 6                                                     | Single-pass membrane protein peptidase, binds and alters the activity of specific voltage-gated potassium channels.                                                                                             |
| <i>DSCAM</i>       | Down Syndrome Cell Adhesion Molecule                                            | Mediates neuronal cell guidance, receptor for netrin required for axon guidance.                                                                                                                                |
| <i>EPHA6</i>       | EPH Receptor A6                                                                 | Receptor tyrosine kinase involved in bidirectional signalling into neighbouring cells. Originally identified as mediators of axon guidance                                                                      |
| <i>FHIT</i>        | Fragile Histidine Triad Diadenosine Triphosphatase, AP3Ase, FRA3B               |                                                                                                                                                                                                                 |
| <i>GRID1</i>       | Glutamate Ionotropic Receptor Delta Type Subunit 1                              | Glutamate receptors are the major excitatory neurotransmitter receptors in the brain                                                                                                                            |
| <i>GRID2</i>       | Glutamate Ionotropic Receptor Delta Type Subunit 2                              |                                                                                                                                                                                                                 |
| <i>GRM1</i>        | Glutamate Metabotropic Receptor 1                                               |                                                                                                                                                                                                                 |
| <i>GRM5</i>        | Glutamate Metabotropic Receptor 5, Protein Phosphatase 1, Regulatory Subunit 86 | Activates a phosphatidylinositol-calcium second messenger system, may be involved in the regulation of neural network activity and synaptic plasticity.                                                         |
| <i>KALRN</i>       | Kalirin RhoGEF Kinase, Huntingtin-Associated Protein-Interacting Protein        | Associated with schizophrenia. Interacts with the huntingtin-associated protein 1,                                                                                                                              |

|               |                                                                 |                                                                                                          |
|---------------|-----------------------------------------------------------------|----------------------------------------------------------------------------------------------------------|
| <i>KCNMA1</i> | Potassium Calcium-Activated Channel Subfamily M Alpha 1         |                                                                                                          |
| <i>LRRC1</i>  | Leucine Rich Repeat Containing 1, LANO                          |                                                                                                          |
| <i>NBEA</i>   | Neurobeachin, LYST2, Lysosomal-Trafficking Regulator 2          | May be associated with autism spectrum disorder                                                          |
| <i>NRG3</i>   | Neuregulin 3                                                    | Associated with schizophrenia                                                                            |
| <i>PCDH15</i> | Protocadherin Related 15, CDHR15, DFNB23                        | Mediates calcium-dependent cell-cell adhesion, required for maintenance of retinal and cochlear function |
| <i>PLCL1</i>  | Phospholipase C Like 1                                          |                                                                                                          |
| <i>PTPRK</i>  | Protein Tyrosine Phosphatase Receptor Type K, Phosphatase Kappa |                                                                                                          |
| <i>PTPRT</i>  | Protein Tyrosine Phosphatase Receptor Type T                    | Associated with autism spectrum disorder and schizophrenia                                               |
| <i>RALYL</i>  | RALY RNA Binding Protein Like, HNRPCL3                          |                                                                                                          |
| <i>ROBO2</i>  | Roundabout Guidance Receptor 2, SAX3 3                          | Transmembrane receptor for SLIT2, functions in axon guidance and cell migration                          |
| <i>SH3GL2</i> | SH3 Domain Containing GRB2 Like 2, Endophilin A1                | SH3 Domain Containing GRB2 Like 2, Endophilin A1, associated with late onset Parkinson's disease         |

### ***Adrenergic versus Mesenchymal switch***

| <b>Gene Symbol</b> | <b>Gene/protein name</b>                                                 | <b>Comments</b>                                                                                                                                                                                                 |
|--------------------|--------------------------------------------------------------------------|-----------------------------------------------------------------------------------------------------------------------------------------------------------------------------------------------------------------|
| <i>ASCL1</i>       | Achaete-Scute Family BHLH Transcription Factor 1, HASH1, MASH1           | BHLH transcription factor, plays a role in the neuronal commitment and differentiation                                                                                                                          |
| <i>DBH</i>         | Dopamine Beta-Hydroxylase                                                | Present in adrenal neurosecretory vesicles and chromaffin granules, catalyses the conversion of dopamine to norepinephrine, which is the main neurotransmitter of the sympathetic nervous system and a hormone. |
| <i>EYA1</i>        | EYA Transcriptional Coactivator And Phosphatase 1, Eyes Absent Homolog 1 |                                                                                                                                                                                                                 |
| <i>FN1</i>         | Fibronectin 1                                                            | Involved in cell adhesion and migration                                                                                                                                                                         |
| <i>FOSL</i>        | FOS Like 2, AP-1 Transcription Factor Subunit, FRA2                      | AP-1 transcription factor family member                                                                                                                                                                         |
| <i>GATA2</i>       | GATA Binding Protein 2, Endothelial Transcription Factor GATA-2          | Member of the GATA family of zinc-finger transcription factors                                                                                                                                                  |



|                |                                                                            |                                                                                                                                                                                                                                                      |
|----------------|----------------------------------------------------------------------------|------------------------------------------------------------------------------------------------------------------------------------------------------------------------------------------------------------------------------------------------------|
| <i>GATA3</i>   | GATA Binding Protein 3                                                     | Member of the GATA family of zinc-finger transcription factors                                                                                                                                                                                       |
| <i>HAND1</i>   | Heart And Neural Crest Derivatives Expressed 1, BHLHa27                    | Member of the basic helix-loop-helix family of transcription factors.                                                                                                                                                                                |
| <i>HAND2</i>   | Heart And Neural Crest Derivatives Expressed 2, BHLHa26                    | Member of the basic helix-loop-helix family of transcription factors.                                                                                                                                                                                |
| <i>HES1</i>    | Hes Family BHLH Transcription Factor 1, BHLHb39, Hairy/Enhancer Of Split 1 | Member of the basic helix-loop-helix family of transcription factors, transcriptional repressor of genes activated by other bHLH factors                                                                                                             |
| <i>ISL1</i>    | ISL LIM Homeobox 1, Insulin Gene Enhancer Protein ISL-1                    | Member of the LIM/homeodomain family of transcription factors                                                                                                                                                                                        |
| <i>JAG1</i>    | Jagged Canonical Notch Ligand 1, Jagged 1                                  | Ligand for NOTCH1                                                                                                                                                                                                                                    |
| <i>KLF13</i>   | Kruppel Like Factor 13                                                     | Zinc finger transcription factor, associated with schizophrenia                                                                                                                                                                                      |
| <i>KLF7</i>    | Kruppel Like Factor 7                                                      | Zinc finger transcription factor                                                                                                                                                                                                                     |
| <i>MAML2</i>   | Mastermind Like Transcriptional Coactivator 2                              | Transcriptional coactivator for NOTCH proteins.                                                                                                                                                                                                      |
| <i>NEFL</i>    | Neurofilament Light Chain                                                  | Neurofilaments are neuronal intermediate filaments, helping maintain neuronal shaper, may also be involved in intracellular transport to axons and dendrites                                                                                         |
| <i>NEUROG2</i> | Neurogenin 2, NGN2                                                         | BHLH transcription factor involved in neuronal commitment and differentiation                                                                                                                                                                        |
| <i>NOTCH1</i>  | Notch Receptor 1, Neurogenic Locus Notch Homolog Protein 1                 |                                                                                                                                                                                                                                                      |
| <i>NOTCH3</i>  | Notch Receptor 3, Neurogenic Locus Notch Homolog Protein 3                 |                                                                                                                                                                                                                                                      |
| <i>PHOX2A</i>  | Paired Like Homeobox 2A, Paired Mesoderm Homeobox Protein 2A               | Transcription factor involved in development of the autonomic nervous system, regulates the expression of tyrosine hydroxylase (TH) and DBH, both essential for the differentiation and maintenance of the noradrenergic neurotransmitter phenotype. |
| <i>PHOX2B</i>  | Paired Like Homeobox 2B, Neuroblastoma Paired-Type Homeobox Protein        | Transcription factor involved in development of the autonomic nervous system                                                                                                                                                                         |
| <i>SNAI2</i>   | Snail Family Transcriptional Repressor 2                                   | Member of the Snail family of C2H2-type zinc finger transcription factors, involved in epithelial-mesenchymal transitions                                                                                                                            |
| <i>SYN3</i>    | Synapsin III                                                               | May be involved in the regulation of neurotransmitter release and synaptogenesis                                                                                                                                                                     |

|               |                                                       |                                                                                                                                                          |
|---------------|-------------------------------------------------------|----------------------------------------------------------------------------------------------------------------------------------------------------------|
| <i>TH</i>     | Tyrosine Hydroxylase                                  | Key role in adrenergic neurones, involved in the conversion of tyrosine to dopamine which is the rate limiting step in the generation of catecholamines. |
| <i>WWTR1</i>  | WW Domain Containing Transcription Regulator 1        | Transcription factor, works in conjunction with YAP1, promotes epithelial-mesenchymal transition                                                         |
| <i>YAP1</i>   | Yes1 Associated Transcriptional Regulator             | Transcription factor, downstream target of Hippo pathway                                                                                                 |
| <i>ZNF356</i> | CDKN1A Interacting Zinc Finger Protein 1, CIZ1, NUP94 |                                                                                                                                                          |

## Supplementary Tables

**Table S2 Differential gene expression of genes from the REACTOME Signalling by Retinoic Acid pathway.** DEG data was filtered to only include values where the Log2FC >1 or <-1, with a Padj value <0.05. RARE score was derived from the presence of a clear RXRA ChIP-seq peak in or near the gene promoter (P), or potential enhancer (presence of RXRA peak coincident with H3K27Ac peak internal (IE), upstream (UE) or downstream (DE) of gene. RAX ChIP-seq data was derived from SK-N-SH cells (ENCODE).

| Gene           | WT con v WT ATRA |             | BKO con v BKO ATRA |             | WT con v BKO con |             | WT ATRA v BKO ATRA |             | RARE     |
|----------------|------------------|-------------|--------------------|-------------|------------------|-------------|--------------------|-------------|----------|
|                | Log2FC           | Log10(Padj) | Log2FC             | Log10(Padj) | Log2FC           | Log10(Padj) | Log2FC             | Log10(Padj) |          |
| <i>CYP26A1</i> | 13.5             | -112.1      | 13.9               | -40.8       |                  |             | -1.3               | -104.5      | YES - P  |
| <i>CYP26B1</i> | 15.0             | -125.7      | 11.8               | -180.5      |                  |             | -2.4               | -177.9      | YES-UE   |
| <i>CRABP2</i>  | 5.9              | < -255      | 6.1                | < -255      | -3.3             | -146.1      | -3.1               | -209.6      | YES-UE   |
| <i>DHRS3</i>   | 9.2              | -119.1      | 7.4                | -16.8       | -2.4             | -1.4        | -4.1               | -224.0      | YES-P/UE |
| <i>RARA</i>    | 1.7              | -43.1       | 1.7                | -43.5       |                  |             |                    |             | YES-P    |
| <i>RARB</i>    | 4.8              | < -255      | 4.1                | < -255      |                  |             |                    |             | YES-P    |
| <i>RARG</i>    | 1.1              | -39.8       |                    |             | 1.1              | -42.0       |                    |             | YES-P    |
| <i>PPARD</i>   |                  |             | 1.1                | -18.9       |                  |             |                    |             | YES-IE   |
| <i>PDK1</i>    |                  |             | 1.5                | -39.2       |                  |             |                    |             | NO       |
| <i>PDK3</i>    |                  |             | 1.2                | -20.7       |                  |             |                    |             | NO       |
| <i>PDK4</i>    | 1.2              | -2.2        |                    |             | 2.7              | -13.8       | 1.7                | -7.0        | YES-EU   |
| <i>RDH10</i>   | 1.6              | -5.7        | 2.0                | -8.2        |                  |             |                    |             | NO       |
| <i>AKR1C3</i>  | 2.6              | -5.5        |                    |             | 1.3              | -1.4        |                    |             | NO       |
| <i>RET</i>     | 3.8              | < -255      | 3.5                | < -255      |                  |             |                    |             | YES-EU   |

**Table S3. Differential gene expression of selected neuronal differentiation genes.** See legend to Table S2

| Gene           | WT con v WT ATRA |             | BKO con v BKO ATRA |             | WT con v BKO con |             | WT ATRA v BKO ATRA |             | RARE    |
|----------------|------------------|-------------|--------------------|-------------|------------------|-------------|--------------------|-------------|---------|
|                | Log2FC           | Log10(Padj) | Log2FC             | Log10(Padj) | Log2FC           | Log10(Padj) | Log2FC             | Log10(Padj) |         |
| <i>NTRK2</i>   | 7.7              | < -255      | 7.3                | -47.3       | -3.2             | -8.5        | -3.6               | < -255      | NO      |
| <i>BCL2</i>    | 1.1              | -31.3       |                    |             |                  |             | -2.2               | -117.7      | YES-IE  |
| <i>NTRK1</i>   | 1.6              | -20.8       |                    |             |                  |             | -1.2               | -11.0       | NO      |
| <i>NCAM2</i>   | 2.8              | -46.2       |                    |             | 2.6              | -39.2       |                    |             | NO      |
| <i>HOXD11</i>  | 2.1              | -128.2      | 1.3                | -50.1       |                  |             |                    |             | YES - E |
| <i>HOXD12</i>  | 3.8              | -2.7        |                    |             |                  |             |                    |             | YES - E |
| <i>GAP43</i>   |                  |             |                    |             | -2.1             | -245.1      | -2.5               |             | YES-UE  |
| <i>MAP2</i>    |                  |             |                    |             | -1.9             | -92.8       | -1.8               | -90.1       | YES-P/E |
| <i>SYP</i>     |                  |             |                    |             |                  |             | -1.4               | -79.5       | NO      |
| <i>RELN</i>    | -2.8             |             | -1.3               | -10.4       | -0.9             | -6          | 2.4                | -32.1       | NO      |
| <i>ARX</i>     | -7.3             |             |                    |             | -7.1             | -2.2        |                    |             | NO      |
| <i>SEZ6L</i>   |                  |             | -1.5               | -6.3        | -6.7             | < -255      | -7.5               | -217.7      | NO      |
| <i>NEFM</i>    |                  |             |                    |             | -1.5             | -97.3       | -2.4               | -242.1      | NO      |
| <i>ASCL1</i>   | -3.8             | -270        | -1.0               | -13         | -3.8             | -262        |                    |             | NO      |
| <i>NEUROG2</i> | -1.5             | -51         |                    |             | -3.3             | -146        | -1.1               | -19         | NO      |
| <i>NEUROD1</i> |                  |             | -1.6               | -23.0       |                  |             |                    |             | NO      |
| <i>MYC</i>     | -4.2             |             | -2.7               | -224.5      |                  |             | 2.1                | -95.9       | NO      |
| <i>CDKN1A</i>  | 1.1              |             | -1.1               | -39.6       | 1.6              | -84.9       |                    |             | Yes - P |
| <i>CCNA1</i>   | 2.5              |             | 2.2                | -25.0       |                  |             | -1.2               | -13.5       | NO      |

**Table S4. KEGG pathways associated with genes down-regulated in TOP2B null cells (BKO98) compared to WT SH-Sy5Y cells.**

| KEGG pathway                            | Down regulated genes |                      |           |                   |
|-----------------------------------------|----------------------|----------------------|-----------|-------------------|
|                                         | KEGG id              | Negative Log10(Padj) | term_size | intersection_size |
| cAMP signaling pathway                  | KEGG:04024           | 4.556440493          | 216       | 47                |
| Axon guidance                           | KEGG:04360           | 4.556440493          | 181       | 42                |
| Cholinergic synapse                     | KEGG:04725           | 3.360475828          | 113       | 28                |
| Dopaminergic synapse                    | KEGG:04728           | 3.192431946          | 131       | 30                |
| GABAergic synapse                       | KEGG:04727           | 3.192431946          | 89        | 23                |
| Cocaine addiction                       | KEGG:05030           | 3.192431946          | 49        | 16                |
| Morphine addiction                      | KEGG:05032           | 3.192431946          | 89        | 23                |
| Nicotine addiction                      | KEGG:05033           | 3.156957993          | 40        | 14                |
| Neuroactive ligand-receptor interaction | KEGG:04080           | 3.001747619          | 340       | 58                |
| Glutamatergic synapse                   | KEGG:04724           | 2.861574871          | 114       | 26                |

## References for Supplemental Figures.

1. Thorvaldsdottir H, Robinson JT, Mesirov JP (2013) Integrative Genomics Viewer (IGV): high-performance genomics data visualization and exploration. *Brief Bioinform* 14 (2):178-192. doi:10.1093/bib/bbs017
2. Zimmerman MW, Liu Y, He S, Durbin AD, Abraham BJ, Easton J, Shao Y, Xu B, Zhu S, Zhang X, Li Z, Weichert-Leahey N, Young RA, Zhang J, Look AT (2018) MYC Drives a Subset of High-Risk Pediatric Neuroblastomas and Is Activated through Mechanisms Including Enhancer Hijacking and Focal Enhancer Amplification. *Cancer Discov* 8 (3):320-335. doi:10.1158/2159-8290.CD-17-0993
3. Gartlgruber M, Sharma AK, Quintero A, Dreidax D, Jansky S, Park Y-G, Kreth S, Meder J, Doncevic D, Saary P, Toprak UH, Ishaque N, Afanasyeva E, Wecht E, Koster J, Versteeg R, Grünewald TGP, Jones DTW, Pfister SM, Henrich K-O, van Nes J, Herrmann C, Westermann F (2021) Super enhancers define regulatory subtypes and cell identity in neuroblastoma. *Nature Cancer* 2 (1):114-128. doi:10.1038/s43018-020-00145-w
4. van Groningen T, Akogul N, Westerhout EM, Chan A, Hasselt NE, Zwijnenburg DA, Broekmans M, Stroeken P, Haneveld F, Hooijer GKJ, Savci-Heijink CD, Lakeman A, Volckmann R, van Sluis P, Valentijn LJ, Koster J, Versteeg R, van Nes J (2019) A NOTCH feed-forward loop drives reprogramming from adrenergic to mesenchymal state in neuroblastoma. *Nat Commun* 10 (1):1530. doi:10.1038/s41467-019-09470-w
5. van Groningen T, Koster J, Valentijn LJ, Zwijnenburg DA, Akogul N, Hasselt NE, Broekmans M, Haneveld F, Nowakowska NE, Bras J, van Noesel CJM, Jongejan A, van Kampen AH, Koster L, Baas F, van Dijk-Kerkhoven L, Huizer-Smit M, Lecca MC, Chan A, Lakeman A, Molenaar P, Volckmann R, Westerhout EM, Hamdi M, van Sluis PG, Ebus ME, Molenaar JJ, Tytgat GA, Westerman BA, van Nes J, Versteeg R (2017) Neuroblastoma is composed of two super-enhancer-associated differentiation states. *Nat Genet* 49 (8):1261-1266. doi:10.1038/ng.3899
6. Gonzalez-Buendia E, Zhao J, Wang L, Mukherjee S, Zhang D, Arrieta VA, Feldstein E, Kane JR, Kang SJ, Lee-Chang C, Mahajan A, Chen L, Realubit R, Karan C, Magnuson L, Horbinski C, Marshall SA, Sarkaria JN, Mohyeldin A, Nakano I, Bansal M, James CD, Brat DJ, Ahmed A, Canoll P, Rabadan R, Shilatifard A, Sonabend AM (2021) TOP2B Enzymatic Activity on Promoters and Introns Modulates Multiple Oncogenes in Human Gliomas. *Clin Cancer Res* 27 (20):5669-5680. doi:10.1158/1078-0432.CCR-21-0312
